# Supplementary material for: Comprehensive analysis of cancer breakpoints reveals signatures of genetic and epigenetic contribution to cancer genome rearrangements
Source: PLoS Comput Biol. 2021 Mar 1;17(3):e1008749. doi: 10.1371/journal.pcbi.1008749 (PMC7951985; doi:10.1371/journal.pcbi.1008749)
Supplement: S7 Table — Performance metrics for hotspot prediction models for each labeling and cancer type by each feature group separately. (XLSX) [file pcbi.1008749.s024.xlsx]

## Sheet: Table S7
S7 Table. Performance metrics for feature group models.
Performance metrics for hotspot prediction models for each labeling and cancer type by each feature group separately.
Cancer type	Labeling type	Feature group	Min test ROC AUC	SD test ROC AUC	Median test ROC AUC	Mean test ROC AUC	Train-test difference ROC AUC	Lower bound of confidence interval for mean test ROC AUC	Upper bound of confidence interval for mean test ROC AUC	Mean test PR AUC	Lower bound of confidence interval for mean test PR AUC	Upper bound of confidence interval for mean test PR AUC	0.03 probability percentile								0.05 probability percentile
													Mean recall	Mean lift of recall	Lower bound of confidence interval for mean lift of recall	Upper bound of confidence interval for mean lift of recall	Mean precision	Mean lift of precision	Lower bound of confidence interval for mean lift of precision	Upper bound of confidence interval for mean lift of precision	Mean recall	Mean lift of recall	Lower bound of confidence interval for mean lift of recall	Upper bound of confidence interval for mean lift of recall	Mean precision	Mean lift of precision	Lower bound of confidence interval for mean lift of precision	Upper bound of confidence interval for mean lift of precision
blood	99.	chromatin	0.479592	0.0183111	0.502036	0.504138	0.0431754	0.497586	0.510691	0.0100026	0.00963994	0.0103653	0.0235294	0.784314	0.611458	0.957169	0.00757576	0.757576	0.590613	0.924538	0.0423529	0.847059	0.654801	1.03932	0.00820046	0.820046	0.633919	1.00617
blood	99.	histones	0.502612	0.0215427	0.533712	0.537617	0.0415375	0.529908	0.545326	0.0130735	0.0123241	0.013823	0.0619608	2.06536	1.78974	2.34098	0.0199495	1.99495	1.72873	2.26117	0.0894118	1.78824	1.5922	1.98427	0.0173121	1.73121	1.54142	1.92099
blood	99.	reg	0.487452	0.0236012	0.531486	0.530323	0.0504968	0.521877	0.538768	0.0117687	0.0111657	0.0123716	0.0447059	1.4902	1.26482	1.71557	0.0143939	1.43939	1.2217	1.65709	0.0690196	1.38039	1.19312	1.56767	0.0133637	1.33637	1.15507	1.51767
blood	99.	sec_str	0.51069	0.016287	0.553778	0.551956	0.0541546	0.546128	0.557785	0.014114	0.0129948	0.0152333	0.0494118	1.64706	1.41574	1.87838	0.0159091	1.59091	1.36747	1.81435	0.100392	2.00784	1.81289	2.20279	0.0194381	1.94381	1.75508	2.13255
blood	99.	tad	0.487415	0.00736584	0.497633	0.498354	0.0117727	0.495718	0.50099	0.010262	0.0098875	0.0106366	0.0176471	0.588235	0.412458	0.764012	0.00568182	0.568182	0.398397	0.737966	0.0196078	0.392157	0.270375	0.513939	0.00379651	0.379651	0.261753	0.497549
blood	99.	tf	0.488159	0.020821	0.538529	0.537576	0.0695652	0.530125	0.545026	0.0141835	0.012429	0.015938	0.0427451	1.42484	1.24625	1.60342	0.0137626	1.37626	1.20376	1.54876	0.0686275	1.37255	1.2533	1.4918	0.0132878	1.32878	1.21333	1.44422
blood	99.5.	chromatin	0.466404	0.0347809	0.518955	0.527206	0.0717879	0.51476	0.539652	0.00630232	0.00576405	0.0068406	0.044697	1.4899	1.11667	1.86313	0.00744949	1.4899	1.11667	1.86313	0.0636364	1.27273	0.94351	1.60194	0.00637813	1.27563	0.94566	1.60559
blood	99.5.	histones	0.509918	0.0368962	0.584181	0.58966	0.0696892	0.576457	0.602863	0.00842291	0.00784647	0.00899936	0.0833333	2.77778	2.38568	3.16988	0.0138889	2.77778	2.38568	3.16988	0.134091	2.68182	2.43886	2.92477	0.0134396	2.68793	2.44442	2.93144
blood	99.5.	reg	0.501448	0.0385034	0.592331	0.58763	0.0567822	0.573852	0.601408	0.0109785	0.00824635	0.0137107	0.0704545	2.34848	2.01191	2.68506	0.0117424	2.34848	2.01191	2.68506	0.0962121	1.92424	1.66202	2.18646	0.00964313	1.92863	1.66581	2.19144
blood	99.5.	sec_str	0.491299	0.0377188	0.558609	0.563985	0.0997268	0.550487	0.577482	0.00790526	0.00717139	0.00863914	0.0537879	1.79293	1.4197	2.16616	0.00896465	1.79293	1.4197	2.16616	0.103788	2.07576	1.76867	2.38285	0.0104024	2.08049	1.7727	2.38827
blood	99.5.	tad	0.46359	0.0123602	0.493881	0.494831	0.0209797	0.490408	0.499254	0.00489141	0.00477745	0.00500537	0.0159091	0.530303	0.314951	0.745655	0.00265152	0.530303	0.314951	0.745655	0.0295455	0.590909	0.436009	0.745809	0.00296128	0.592255	0.437002	0.747508
blood	99.5.	tf	0.507177	0.043573	0.592721	0.581352	0.0946697	0.56576	0.596944	0.0096924	0.00735701	0.0120278	0.0401515	1.33838	1.04759	1.62917	0.00669192	1.33838	1.04759	1.62917	0.0727273	1.45455	1.1797	1.72939	0.00728929	1.45786	1.18239	1.73333
blood	99.9.	chromatin	0.280344	0.0951367	0.519839	0.52053	0.248488	0.486486	0.554574	0.00117435	0.000922007	0.0014267	0.047619	1.5873	0.655758	2.51885	0.00126263	1.26263	0.521626	2.00363	0.0904762	1.80952	1.12586	2.49319	0.00144267	1.44267	0.89761	1.98773
blood	99.9.	histones	0.521637	0.0876046	0.645945	0.671568	0.138457	0.640219	0.702917	0.00279361	0.00213438	0.00345283	0.138095	4.60317	3.29978	5.90657	0.00366162	3.66162	2.62483	4.69841	0.166667	3.33333	2.36215	4.30452	0.00265756	2.65756	1.88326	3.43185
blood	99.9.	reg	0.461902	0.0841709	0.639025	0.628815	0.155778	0.598695	0.658935	0.00994224	0.00412801	0.0157565	0.114286	3.80952	2.51255	5.1065	0.0030303	3.0303	1.99862	4.06199	0.152381	3.04762	2.08202	4.01322	0.00242976	2.42976	1.65992	3.19961
blood	99.9.	sec_str	0.556513	0.0755174	0.739654	0.731018	0.110568	0.703994	0.758042	0.00427654	0.00297558	0.0055775	0.157143	5.2381	3.79843	6.67776	0.00416667	4.16667	3.02148	5.31186	0.252381	5.04762	4.09139	6.00384	0.0040243	4.0243	3.26193	4.78666
blood	99.9.	tad	0.338688	0.0919085	0.491057	0.517259	0.0576642	0.48437	0.550148	0.00187896	0.00111571	0.0026422	0.0666667	2.22222	1.15071	3.29373	0.00176768	1.76768	0.91534	2.62001	0.0904762	1.80952	1.02749	2.59156	0.00144267	1.44267	0.819182	2.06616
blood	99.9.	tf	0.479787	0.0751876	0.664421	0.653335	0.155244	0.626429	0.68024	0.00169888	0.00137692	0.00202084	0.0904762	3.01587	1.79171	4.24004	0.00239899	2.39899	1.42522	3.37276	0.114286	2.28571	1.50753	3.0639	0.00182232	1.82232	1.2019	2.44274
bone	99.	chromatin	0.517234	0.0185425	0.546845	0.548738	0.00929614	0.542102	0.555373	0.0172685	0.0153348	0.0192022	0.0748062	2.49354	2.2098	2.77728	0.0243687	2.43687	2.15957	2.71416	0.116667	2.33333	2.09345	2.57322	0.022855	2.2855	2.05053	2.52047
bone	99.	reg	0.555201	0.0162996	0.587955	0.588013	0.0302126	0.58218	0.593845	0.0183443	0.0165671	0.0201215	0.0689922	2.29974	2.00623	2.59325	0.0224747	2.24747	1.96063	2.53432	0.127132	2.54264	2.34603	2.73925	0.0249051	2.49051	2.29793	2.68309
bone	99.	sec_str	0.563609	0.0211804	0.584101	0.590413	0.0318665	0.582834	0.597992	0.0229566	0.0205643	0.025349	0.105814	3.52713	3.25371	3.80056	0.0344697	3.44697	3.17976	3.71418	0.14031	2.8062	2.62214	2.99027	0.0274867	2.74867	2.56838	2.92896
bone	99.	tad	0.487874	0.00458675	0.499137	0.499778	0.00946462	0.498137	0.501419	0.00997399	0.00975596	0.010192	0.0151163	0.503876	0.382249	0.625503	0.00492424	0.492424	0.373562	0.611287	0.0170543	0.341085	0.249053	0.433117	0.00334093	0.334093	0.243948	0.424238
bone	99.	tf	0.523827	0.0207418	0.561597	0.565237	0.0557362	0.557814	0.572659	0.01581	0.0144172	0.0172029	0.0810078	2.70026	2.41004	2.99047	0.0263889	2.63889	2.35527	2.92251	0.115504	2.31008	2.15107	2.46908	0.0226272	2.26272	2.10697	2.41846
bone	99.5.	chromatin	0.46117	0.03454	0.580441	0.577847	0.00653557	0.565488	0.590207	0.011224	0.00907613	0.0133718	0.0960317	3.20106	2.78257	3.61954	0.0152778	3.05556	2.65609	3.45502	0.138095	2.7619	2.38911	3.1347	0.0132118	2.64237	2.28571	2.99903
bone	99.5.	reg	0.511863	0.0355913	0.603579	0.605593	0.0449382	0.592857	0.61833	0.0141162	0.0109729	0.0172595	0.0912698	3.04233	2.64011	3.44455	0.0145202	2.90404	2.5201	3.28798	0.137302	2.74603	2.4121	3.07996	0.0131359	2.62718	2.30771	2.94666
bone	99.5.	sec_str	0.516367	0.0327401	0.608113	0.605672	0.0708923	0.593956	0.617388	0.0135431	0.0115312	0.015555	0.142063	4.73545	4.11375	5.35715	0.022601	4.5202	3.92676	5.11364	0.184921	3.69841	3.27463	4.1222	0.0176917	3.53834	3.1329	3.94379
bone	99.5.	tad	0.464657	0.0103277	0.489277	0.489758	0.0229424	0.486062	0.493454	0.00451642	0.00443992	0.00459292	0.00396825	0.132275	0.0246236	0.239927	0.000631313	0.126263	0.0235043	0.229021	0.00873016	0.174603	0.0798502	0.269356	0.000835232	0.167046	0.0763943	0.257698
bone	99.5.	tf	0.475194	0.0380638	0.597266	0.588124	0.0831589	0.574503	0.601745	0.0093882	0.00759815	0.0111782	0.0873016	2.91005	2.45434	3.36576	0.0138889	2.77778	2.34278	3.21277	0.115873	2.31746	1.97744	2.65748	0.0110858	2.21716	1.89186	2.54246
bone	99.9.	chromatin	0.415391	0.070239	0.550916	0.551301	0.132125	0.526166	0.576436	0.00531975	0.00263119	0.00800831	0.166667	5.55556	4.31275	6.79836	0.00568182	5.68182	4.41077	6.95287	0.177778	3.55556	2.70471	4.40641	0.00364465	3.64465	2.77248	4.51682
bone	99.9.	reg	0.561607	0.0543202	0.669322	0.669196	0.105136	0.649758	0.688635	0.00188484	0.00172964	0.00204003	0.0037037	0.123457	-0.118519	0.365432	0.000126263	0.126263	-0.121212	0.373737	0.0592593	1.18519	0.730844	1.63953	0.00121488	1.21488	0.749156	1.68061
bone	99.9.	sec_str	0.535174	0.0609786	0.631417	0.636914	0.208636	0.615093	0.658735	0.00193897	0.00146427	0.00241367	0.0666667	2.22222	1.20153	3.24292	0.00227273	2.27273	1.22883	3.31662	0.0888889	1.77778	1.07268	2.48288	0.00182232	1.82232	1.09955	2.54509
bone	99.9.	tad	0.396592	0.0848532	0.529423	0.534276	0.105413	0.503912	0.564641	0.00131029	0.00114333	0.00147726	0.0259259	0.864198	0.294053	1.43434	0.000883838	0.883838	0.300736	1.46694	0.0555556	1.11111	0.65597	1.56625	0.00113895	1.13895	0.672407	1.6055
bone	99.9.	tf	0.39432	0.0847231	0.616995	0.606616	0.168296	0.576298	0.636934	0.0017475	0.00156666	0.00192834	0.062963	2.09877	1.34554	2.85199	0.00214646	2.14646	1.37612	2.91681	0.0962963	1.92593	1.38403	2.46782	0.00197418	1.97418	1.41871	2.52966
brain	99.	chromatin	0.50417	0.0126825	0.539287	0.537917	0.0275741	0.533379	0.542456	0.0134738	0.0127817	0.0141659	0.0651163	2.17054	1.93845	2.40263	0.0212121	2.12121	1.8944	2.34803	0.0856589	1.71318	1.55335	1.87301	0.0167806	1.67806	1.52151	1.83461
brain	99.	histones	0.517613	0.0282161	0.569324	0.571873	0.0455909	0.561776	0.58197	0.0171155	0.0152587	0.0189723	0.0651163	2.17054	1.85384	2.48725	0.0212121	2.12121	1.81171	2.43072	0.0968992	1.93798	1.70227	2.1737	0.0189825	1.89825	1.66737	2.12914
brain	99.	methyl	0.527976	0.0119065	0.553275	0.55372	0.0117628	0.549459	0.55798	0.0146191	0.0139162	0.0153219	0.0674419	2.24806	1.95804	2.53809	0.0219697	2.19697	1.91354	2.4804	0.115891	2.31783	2.1507	2.48496	0.0227031	2.27031	2.10661	2.43402
brain	99.	reg	0.489305	0.0234669	0.542315	0.542792	0.0537471	0.534394	0.551189	0.01325	0.0121559	0.0143441	0.0507752	1.69251	1.4725	1.91251	0.0165404	1.65404	1.43903	1.86905	0.0821705	1.64341	1.42824	1.85858	0.0160972	1.60972	1.39896	1.82048
brain	99.	sec_str	0.518511	0.0253252	0.591337	0.593152	0.0371408	0.584089	0.602214	0.0249337	0.0224688	0.0273985	0.126357	4.21189	3.96023	4.46354	0.0411616	4.11616	3.87023	4.3621	0.172093	3.44186	3.23178	3.65194	0.033713	3.3713	3.16553	3.57707
brain	99.	tad	0.487086	0.0111103	0.506266	0.506578	0.00608353	0.502602	0.510554	0.0105618	0.010216	0.0109077	0.0391473	1.30491	1.07315	1.53666	0.0127525	1.27525	1.04876	1.50174	0.0507752	1.0155	0.86333	1.16768	0.00994685	0.994685	0.845631	1.14374
brain	99.	tf	0.496036	0.0252169	0.542566	0.545035	0.0902451	0.536011	0.554059	0.012479	0.0119351	0.013023	0.0531008	1.77003	1.56179	1.97826	0.017298	1.7298	1.5263	1.9333	0.0732558	1.46512	1.31035	1.61988	0.0143508	1.43508	1.28349	1.58667
brain	99.5.	chromatin	0.53702	0.0333291	0.592456	0.596197	0.025333	0.58427	0.608124	0.0102731	0.0091298	0.0114164	0.101587	3.38624	2.89189	3.8806	0.0161616	3.23232	2.76044	3.70421	0.15873	3.1746	2.84475	3.50446	0.015186	3.03721	2.72163	3.35279
brain	99.5.	histones	0.536622	0.0350007	0.604513	0.608355	0.0644419	0.59583	0.62088	0.0163826	0.0128677	0.0198976	0.0968254	3.22751	2.83333	3.6217	0.015404	3.08081	2.70454	3.45708	0.118254	2.36508	2.09478	2.63538	0.0113136	2.26272	2.00412	2.52132
brain	99.5.	methyl	0.548737	0.0344044	0.604502	0.604624	0.0139425	0.592312	0.616935	0.00943492	0.00863904	0.0102308	0.0714286	2.38095	2.00804	2.75387	0.0113636	2.27273	1.91676	2.62869	0.143651	2.87302	2.51367	3.23236	0.0137434	2.74867	2.40488	3.09247
brain	99.5.	reg	0.498414	0.0418648	0.56055	0.56825	0.0629772	0.553268	0.583231	0.00953526	0.00759753	0.011473	0.0674603	2.24868	1.77648	2.72087	0.0107323	2.14646	1.69573	2.5972	0.110317	2.20635	1.83874	2.57396	0.0105543	2.11086	1.75916	2.46256
brain	99.5.	sec_str	0.605957	0.0317033	0.689723	0.683886	0.0572252	0.672541	0.695231	0.0216041	0.0184378	0.0247704	0.193651	6.45503	5.81459	7.09546	0.0308081	6.16162	5.55029	6.77294	0.224603	4.49206	4.13216	4.85197	0.0214882	4.29765	3.95332	4.64197
brain	99.5.	tad	0.475485	0.0153256	0.513579	0.511544	0.0129895	0.50606	0.517028	0.0055906	0.00529406	0.00588714	0.0531746	1.77249	1.45011	2.09487	0.0084596	1.69192	1.38419	1.99965	0.0642857	1.28571	1.09507	1.47636	0.00615034	1.23007	1.04767	1.41246
brain	99.5.	tf	0.48105	0.0445366	0.563691	0.56928	0.0946919	0.553342	0.585217	0.00980892	0.00755672	0.0120611	0.0714286	2.38095	1.91518	2.84672	0.0113636	2.27273	1.82813	2.71733	0.097619	1.95238	1.5962	2.30856	0.00933941	1.86788	1.52712	2.20864
brain	99.9.	chromatin	0.417483	0.120373	0.655396	0.661308	0.140754	0.618233	0.704383	0.00149947	0.00121006	0.00178887	0.0555556	1.85185	0.765051	2.93865	0.00126263	1.26263	0.521626	2.00363	0.122222	2.44444	1.61962	3.26927	0.00167046	1.67046	1.1068	2.23412
brain	99.9.	histones	0.387215	0.120855	0.697058	0.665144	0.152654	0.621897	0.708391	0.00158731	0.0013785	0.00179612	0.0222222	0.740741	-0.122407	1.60389	0.000505051	0.505051	-0.0834595	1.09356	0.0944444	1.88889	1.14211	2.63567	0.00129081	1.29081	0.780486	1.80114
brain	99.9.	methyl	0.542407	0.0890406	0.670757	0.685413	0.155254	0.65355	0.717276	0.00263136	0.00206911	0.00319361	0.138889	4.62963	3.34194	5.91731	0.00315657	3.15657	2.2786	4.03453	0.194444	3.88889	3.05519	4.72259	0.00265756	2.65756	2.08783	3.22728
brain	99.9.	reg	0.469286	0.0961965	0.655035	0.640863	0.146745	0.606439	0.675286	0.00153333	0.00116804	0.00189862	0.0833333	2.77778	1.52587	4.02969	0.00189394	1.89394	1.04036	2.74751	0.116667	2.33333	1.43906	3.2276	0.00159453	1.59453	0.983414	2.20565
brain	99.9.	sec_str	0.540509	0.0891084	0.758305	0.749441	0.158449	0.717554	0.781328	0.00475517	0.00371919	0.00579115	0.216667	7.22222	5.73177	8.71267	0.00492424	4.92424	3.90803	5.94046	0.3	6	4.85332	7.14668	0.00410023	4.10023	3.31662	4.88384
brain	99.9.	tad	0.328246	0.090588	0.493294	0.500401	0.0744712	0.467985	0.532818	0.00134744	0.000736755	0.00195813	0.0388889	1.2963	0.441079	2.15151	0.000883838	0.883838	0.300736	1.46694	0.0444444	0.888889	0.352387	1.42539	0.000607441	0.607441	0.240811	0.974071
brain	99.9.	tf	0.450446	0.0864288	0.563573	0.588119	0.243982	0.557191	0.619047	0.00126894	0.00101564	0.00152224	0.0277778	0.925926	0.172365	1.67949	0.000631313	0.631313	0.117522	1.1451	0.0666667	1.33333	0.528581	2.13809	0.000911162	0.911162	0.361217	1.46111
breast	99.	chromatin	0.494596	0.024547	0.533217	0.529595	0.013163	0.520811	0.538379	0.012364	0.0116484	0.0130797	0.0141762	0.472542	0.290069	0.655014	0.00467172	0.467172	0.286773	0.64757	0.0501916	1.00383	0.629348	1.37831	0.00994685	0.994685	0.623614	1.36576
breast	99.	histones	0.498143	0.0289145	0.608928	0.607151	0.0152682	0.596804	0.617498	0.0195072	0.0183531	0.0206613	0.0536398	1.78799	1.22749	2.3485	0.0176768	1.76768	1.21354	2.32181	0.146743	2.93487	2.54083	3.3289	0.0290812	2.90812	2.51768	3.29857
breast	99.	methyl	0.630268	0.0207635	0.667214	0.668995	0.00803925	0.661565	0.676425	0.027618	0.026337	0.0288989	0.0697318	2.32439	1.63375	3.01504	0.0229798	2.29798	1.61518	2.98078	0.174713	3.49425	3.03832	3.95018	0.0346241	3.46241	3.01064	3.91419
breast	99.	reg	0.564593	0.0176468	0.595237	0.598371	0.022801	0.592056	0.604686	0.0191723	0.017787	0.0205577	0.0701149	2.33716	1.96585	2.70848	0.0231061	2.31061	1.94351	2.6777	0.114943	2.29885	1.95795	2.63975	0.022779	2.2779	1.94011	2.61569
breast	99.	sec_str	0.70759	0.0226814	0.744716	0.745676	0.0221356	0.73756	0.753793	0.0332194	0.0316105	0.0348283	0.127203	4.2401	3.90247	4.57774	0.0419192	4.19192	3.85812	4.52572	0.220307	4.40613	4.14413	4.66813	0.0436598	4.36598	4.10637	4.6256
breast	99.	tad	0.4808	0.00548191	0.5	0.498907	0.00461154	0.496945	0.500868	0.0098449	0.00971776	0.00997204	0.0103448	0.344828	0.199238	0.490417	0.00340909	0.340909	0.196974	0.484844	0.0111111	0.222222	0.129344	0.3151	0.00220197	0.220197	0.128166	0.312229
breast	99.	tf	0.603779	0.0265574	0.649019	0.650667	0.0351184	0.641164	0.660171	0.0261019	0.0245467	0.0276572	0.124521	4.1507	3.82251	4.47889	0.0410354	4.10354	3.77907	4.428	0.193487	3.86973	3.62334	4.11613	0.0383447	3.83447	3.59032	4.07862
breast	99.5.	chromatin	0.487126	0.0472584	0.619076	0.608915	0.0128131	0.592004	0.625826	0.00958543	0.00879029	0.0103806	0.0242424	0.808081	0.418574	1.19759	0.0040404	0.808081	0.418574	1.19759	0.0818182	1.63636	1.08833	2.18439	0.00820046	1.64009	1.09081	2.18937
breast	99.5.	histones	0.569025	0.0275517	0.634457	0.636777	0.0205536	0.626918	0.646637	0.0120947	0.0112315	0.0129579	0.132576	4.41919	3.81475	5.02363	0.022096	4.41919	3.81475	5.02363	0.17803	3.56061	3.22676	3.89446	0.0178436	3.56872	3.23411	3.90333
breast	99.5.	methyl	0.601913	0.0281568	0.669034	0.674426	0.0241183	0.66435	0.684501	0.0146471	0.013231	0.0160633	0.0833333	2.77778	2.10866	3.44689	0.0138889	2.77778	2.10866	3.44689	0.202273	4.04545	3.68718	4.40373	0.0202733	4.05467	3.69558	4.41376
breast	99.5.	reg	0.590238	0.0310184	0.636352	0.636841	0.0419526	0.625741	0.647941	0.0112767	0.0102323	0.0123211	0.103788	3.4596	3.07172	3.84747	0.017298	3.4596	3.07172	3.84747	0.166667	3.33333	3.09423	3.57244	0.0167046	3.34093	3.10127	3.58058
breast	99.5.	sec_str	0.731847	0.0235757	0.822835	0.81683	0.0197644	0.808394	0.825267	0.0193859	0.0184945	0.0202772	0.113636	3.78788	3.29464	4.28112	0.0189394	3.78788	3.29464	4.28112	0.241667	4.83333	4.48243	5.18424	0.0242217	4.84434	4.49264	5.19605
breast	99.5.	tad	0.48593	0.0109721	0.502717	0.503217	0.0105867	0.49929	0.507143	0.00522714	0.0050626	0.00539168	0.0242424	0.808081	0.595294	1.02087	0.0040404	0.808081	0.595294	1.02087	0.0363636	0.727273	0.538162	0.916384	0.00364465	0.728929	0.539388	0.918471
breast	99.5.	tf	0.577661	0.0421378	0.656832	0.659216	0.0510765	0.644138	0.674295	0.0229995	0.0199263	0.0260726	0.146212	4.87374	4.38731	5.36017	0.0243687	4.87374	4.38731	5.36017	0.211364	4.22727	3.93396	4.52058	0.0211845	4.2369	3.94292	4.53088
breast	99.9.	chromatin	0.78151	0.0332243	0.876296	0.871109	0.0129814	0.859219	0.882998	0.00569338	0.00405756	0.00732921	0.104167	3.47222	2.16865	4.7758	0.00315657	3.15657	1.9715	4.34163	0.208333	4.16667	3.2467	5.08663	0.00379651	3.79651	2.95827	4.63474
breast	99.9.	histones	0.650799	0.0735908	0.792601	0.779863	0.0650768	0.753529	0.806197	0.00676241	0.00523212	0.0082927	0.25	8.33333	6.67208	9.99459	0.00757576	7.57576	6.06553	9.08599	0.295833	5.91667	5.05399	6.77935	0.00539104	5.39104	4.605	6.17708
breast	99.9.	methyl	0.651689	0.0696866	0.801342	0.794766	0.0532397	0.769829	0.819703	0.00378506	0.00321811	0.00435202	0.0916667	3.05556	1.82146	4.28965	0.00277778	2.77778	1.65588	3.89968	0.291667	5.83333	4.72306	6.9436	0.00531511	5.31511	4.30348	6.32674
breast	99.9.	reg	0.602598	0.0657381	0.773143	0.762614	0.0904198	0.73909	0.786138	0.0042162	0.00337382	0.00505858	0.170833	5.69444	4.31099	7.0779	0.00517677	5.17677	3.91908	6.43446	0.254167	5.08333	4.32265	5.84401	0.00463174	4.63174	3.93864	5.32484
breast	99.9.	sec_str	0.651632	0.0720157	0.875911	0.843943	0.0422405	0.818172	0.869713	0.00437726	0.00388594	0.00486858	0.125	4.16667	3.13069	5.20264	0.00378788	3.78788	2.84608	4.72967	0.266667	5.33333	4.37229	6.29438	0.00485953	4.85953	3.98386	5.73519
breast	99.9.	tad	0.343818	0.0811105	0.517126	0.49619	0.0996494	0.467165	0.525215	0.00107609	0.000953364	0.00119881	0.025	0.833333	0.226729	1.43994	0.000757576	0.757576	0.206117	1.30903	0.0666667	1.33333	0.723703	1.94296	0.00121488	1.21488	0.659411	1.77035
breast	99.9.	tf	0.550936	0.0814456	0.734152	0.738539	0.0704198	0.709394	0.767684	0.00318644	0.00267549	0.00369738	0.108333	3.61111	2.38951	4.83272	0.00328283	3.28283	2.17228	4.39338	0.191667	3.83333	3.10037	4.5663	0.00349279	3.49279	2.82494	4.16063
liver	99.	chromatin	0.492643	0.00266237	0.5	0.499208	0.00316677	0.498255	0.50016	0.00985838	0.00977803	0.00993874	0.00229885	0.0766284	0.0102372	0.14302	0.000757576	0.0757576	0.0101208	0.141394	0.00229885	0.045977	0.0061423	0.0858117	0.000455581	0.0455581	0.00608634	0.0850298
liver	99.	histones	0.494769	0.0210764	0.560353	0.55752	0.0175573	0.549978	0.565062	0.0156959	0.0148183	0.0165735	0.0735632	2.45211	2.10191	2.80231	0.0242424	2.42424	2.07802	2.77046	0.0954023	1.90805	1.66159	2.1545	0.0189066	1.89066	1.64645	2.13487
liver	99.	methyl	0.492002	0.0158643	0.524263	0.522942	0.0124957	0.517265	0.528618	0.0120828	0.0113989	0.0127667	0.0091954	0.306513	0.152066	0.460961	0.0030303	0.30303	0.150338	0.455722	0.0758621	1.51724	1.2326	1.80188	0.0150342	1.50342	1.22137	1.78546
liver	99.	reg	0.489147	0.0244985	0.574132	0.569659	0.0399908	0.560892	0.578426	0.0196015	0.017378	0.021825	0.0632184	2.10728	1.81311	2.40145	0.0208333	2.08333	1.79251	2.37416	0.0923372	1.84674	1.63899	2.0545	0.0182992	1.82992	1.62405	2.03578
liver	99.	sec_str	0.499127	0.0247668	0.546408	0.5439	0.0478395	0.535038	0.552763	0.0135032	0.0126189	0.0143874	0.0371648	1.23883	1.03616	1.44149	0.0122475	1.22475	1.02438	1.42511	0.0582375	1.16475	0.958743	1.37076	0.0115414	1.15414	0.950007	1.35827
liver	99.	tad	0.490574	0.00872432	0.50983	0.509538	0.00437809	0.506416	0.51266	0.01092	0.0106072	0.0112328	0.037931	1.26437	1.05396	1.47478	0.0125	1.25	1.04198	1.45802	0.045977	0.91954	0.782908	1.05617	0.00911162	0.911162	0.775775	1.04655
liver	99.	tf	0.571978	0.0258669	0.62433	0.625343	0.0281174	0.616086	0.634599	0.0217334	0.0201832	0.0232836	0.0984674	3.28225	2.91562	3.64888	0.0324495	3.24495	2.88249	3.60741	0.172414	3.44828	3.18546	3.71109	0.0341686	3.41686	3.15643	3.67728
liver	99.5.	chromatin	0.486603	0.024729	0.515846	0.518201	0.0426894	0.509351	0.52705	0.00590599	0.00545332	0.00635865	0.027907	0.930233	0.515571	1.34489	0.00454545	0.909091	0.503853	1.31433	0.0465116	0.930233	0.66436	1.19611	0.00455581	0.911162	0.65074	1.17158
liver	99.5.	histones	0.512821	0.0219238	0.568369	0.567474	0.0374762	0.559629	0.57532	0.00665379	0.0063294	0.00697817	0.0310078	1.03359	0.721672	1.34551	0.00505051	1.0101	0.705271	1.31493	0.0666667	1.33333	1.08711	1.57956	0.00652999	1.306	1.06482	1.54717
liver	99.5.	methyl	0.493403	0.0289413	0.545073	0.546444	0.0242263	0.536087	0.5568	0.0065789	0.00616457	0.00699323	0.0387597	1.29199	0.963497	1.62048	0.00631313	1.26263	0.941599	1.58365	0.0968992	1.93798	1.66126	2.21471	0.00949127	1.89825	1.6272	2.16931
liver	99.5.	reg	0.501877	0.0308445	0.590808	0.587797	0.0464682	0.576759	0.598835	0.0123214	0.0105423	0.0141005	0.0875969	2.9199	2.43842	3.40138	0.0142677	2.85354	2.383	3.32407	0.118605	2.37209	2.02696	2.71723	0.0116173	2.32346	1.9854	2.66152
liver	99.5.	sec_str	0.507722	0.0333736	0.580768	0.584878	0.0702418	0.572935	0.59682	0.0108041	0.00843865	0.0131696	0.0542636	1.80879	1.47231	2.14526	0.00883838	1.76768	1.43885	2.0965	0.0806202	1.6124	1.37009	1.85472	0.00789674	1.57935	1.342	1.81669
liver	99.5.	tad	0.480503	0.0132836	0.50407	0.508602	0.0230497	0.503849	0.513356	0.00524206	0.0050779	0.00540622	0.0333333	1.11111	0.88442	1.3378	0.00542929	1.08586	0.86432	1.3074	0.0565891	1.13178	0.982381	1.28118	0.0055429	1.10858	0.962241	1.25492
liver	99.5.	tf	0.528024	0.0371401	0.604933	0.602017	0.0574919	0.588726	0.615307	0.00889662	0.00811565	0.0096776	0.0821705	2.73902	2.31591	3.16213	0.0133838	2.67677	2.26328	3.09026	0.14186	2.83721	2.49485	3.17957	0.0138952	2.77904	2.4437	3.11438
liver	99.9.	chromatin	0.420369	0.081379	0.586765	0.594498	0.182402	0.565377	0.623619	0.00142479	0.00119737	0.00165221	0.0416667	1.38889	0.573788	2.20399	0.00126263	1.26263	0.521626	2.00363	0.05	1	0.496116	1.50388	0.000911162	0.911162	0.452042	1.37028
liver	99.9.	histones	0.537929	0.0923517	0.67363	0.673518	0.107736	0.640471	0.706566	0.00184461	0.00159275	0.00209647	0.0416667	1.38889	0.673998	2.10378	0.00126263	1.26263	0.612726	1.91253	0.0791667	1.58333	1.03319	2.13347	0.00144267	1.44267	0.941406	1.94394
liver	99.9.	methyl	0.533066	0.0785371	0.722029	0.711027	0.086452	0.682923	0.739131	0.00193626	0.00168653	0.00218598	0.0416667	1.38889	0.573788	2.20399	0.00126263	1.26263	0.521626	2.00363	0.075	1.5	0.944038	2.05596	0.00136674	1.36674	0.860171	1.87331
liver	99.9.	reg	0.50628	0.0686408	0.660234	0.651947	0.134839	0.627385	0.67651	0.00245234	0.00194598	0.00295871	0.0708333	2.36111	1.60963	3.1126	0.00214646	2.14646	1.4633	2.82963	0.0916667	1.83333	1.21472	2.45195	0.00167046	1.67046	1.1068	2.23412
liver	99.9.	sec_str	0.49728	0.0924595	0.67625	0.672387	0.144024	0.639301	0.705473	0.0232309	0.00921685	0.037245	0.1125	3.75	2.61853	4.88147	0.00340909	3.40909	2.38048	4.4377	0.175	3.5	2.60231	4.39769	0.00318907	3.18907	2.37112	4.00701
liver	99.9.	tad	0.372522	0.0688165	0.48587	0.493609	0.0476468	0.468984	0.518235	0.000995116	0.00087488	0.00111535	0.0166667	0.555556	0.0400406	1.07107	0.000505051	0.505051	0.0364006	0.9737	0.0291667	0.583333	0.198486	0.968181	0.000531511	0.531511	0.180853	0.882169
liver	99.9.	tf	0.503354	0.105504	0.701519	0.706771	0.0723158	0.669017	0.744525	0.00348525	0.00283594	0.00413455	0.195833	6.52778	4.8812	8.17436	0.00593434	5.93434	4.43745	7.43123	0.254167	5.08333	4.1295	6.03717	0.00463174	4.63174	3.76264	5.50084
ovary	99.	chromatin	0.493045	0.0055441	0.500332	0.501174	0.00738879	0.49919	0.503158	0.0101332	0.00991516	0.0103513	0.0191571	0.63857	0.464646	0.812494	0.00631313	0.631313	0.459366	0.803261	0.0191571	0.383142	0.278787	0.487496	0.00379651	0.379651	0.276247	0.483054
ovary	99.	reg	0.554856	0.027486	0.645733	0.641543	0.0362232	0.631707	0.651379	0.0189984	0.0179686	0.0200283	0.0559387	1.86462	1.53124	2.19801	0.0184343	1.84343	1.51384	2.17303	0.0777778	1.55556	1.33771	1.7734	0.0154138	1.54138	1.32552	1.75724
ovary	99.	sec_str	0.664038	0.0200785	0.698798	0.697791	0.0311245	0.690606	0.704976	0.0264874	0.0251863	0.0277885	0.0896552	2.98851	2.59016	3.38685	0.0295455	2.95455	2.56073	3.34837	0.162452	3.24904	2.93395	3.56414	0.0321944	3.21944	2.90722	3.53166
ovary	99.	tad	0.48086	0.00517778	0.493426	0.492963	0.013749	0.49111	0.494816	0.00947165	0.00937651	0.00956679	0.0091954	0.306513	0.196122	0.416905	0.0030303	0.30303	0.193893	0.412167	0.0157088	0.314176	0.226467	0.401885	0.00311314	0.311314	0.224404	0.398224
ovary	99.	tf	0.61716	0.0263723	0.656551	0.66051	0.035845	0.651073	0.669947	0.0306136	0.0278942	0.033333	0.143678	4.78927	4.44065	5.1379	0.0473485	4.73485	4.39019	5.07951	0.20613	4.12261	3.888	4.35721	0.0408504	4.08504	3.85257	4.31751
ovary	99.5.	chromatin	0.481963	0.0142228	0.494353	0.497743	0.0279679	0.492653	0.502832	0.00446565	0.00433468	0.00459663	0.000833333	0.0277778	-0.0266667	0.0822222	0.000126263	0.0252525	-0.0242424	0.0747475	0.00333333	0.0666667	0.00480488	0.128528	0.000303721	0.0607441	0.00437802	0.11711
ovary	99.5.	reg	0.581064	0.0356596	0.631679	0.634394	0.04651	0.621633	0.647155	0.0141231	0.00978569	0.0184605	0.0641667	2.13889	1.65815	2.61962	0.00972222	1.94444	1.50741	2.38148	0.105	2.1	1.73786	2.46214	0.0095672	1.91344	1.58347	2.24341
ovary	99.5.	sec_str	0.603869	0.0342456	0.683637	0.685252	0.0738044	0.672997	0.697506	0.0111023	0.00983016	0.0123745	0.0816667	2.72222	2.17441	3.27004	0.0123737	2.47475	1.97674	2.97276	0.141667	2.83333	2.46236	3.20431	0.0129081	2.58162	2.24361	2.91964
ovary	99.5.	tad	0.465413	0.00970975	0.48512	0.488143	0.0227509	0.484669	0.491618	0.00427834	0.00420381	0.00435287	0.00583333	0.194444	0.0661619	0.322727	0.000883838	0.176768	0.0601472	0.293388	0.0158333	0.316667	0.206639	0.426695	0.00144267	0.288535	0.188281	0.388788
ovary	99.5.	tf	0.563019	0.03675	0.639358	0.627893	0.071642	0.614742	0.641044	0.00929323	0.00844369	0.0101428	0.1125	3.75	3.14975	4.35025	0.0170455	3.40909	2.86341	3.95478	0.158333	3.16667	2.80169	3.53164	0.0144267	2.88535	2.5528	3.21789
ovary	99.9.	chromatin	0.513863	0.0545466	0.64432	0.641047	0.146744	0.621528	0.660566	0.00147542	0.00133922	0.00161163	0.0166667	0.555556	-0.0918054	1.20292	0.000505051	0.505051	-0.0834595	1.09356	0.025	0.5	0.0667975	0.933202	0.000455581	0.455581	0.0608634	0.850298
ovary	99.9.	reg	0.520947	0.067974	0.692769	0.686646	0.0938815	0.662322	0.71097	0.00195107	0.00174181	0.00216032	0.0208333	0.694444	0.129274	1.25962	0.000631313	0.631313	0.117522	1.1451	0.0666667	1.33333	0.723703	1.94296	0.00121488	1.21488	0.659411	1.77035
ovary	99.9.	sec_str	0.506009	0.0810084	0.68227	0.677681	0.170529	0.648692	0.706669	0.00232096	0.00197928	0.00266263	0.0791667	2.63889	1.49842	3.77936	0.00239899	2.39899	1.3622	3.43578	0.175	3.5	2.51438	4.48562	0.00318907	3.18907	2.29101	4.08712
ovary	99.9.	tad	0.323821	0.0797209	0.573878	0.566023	0.0366571	0.537496	0.594551	0.00223049	0.00165175	0.00280923	0.0791667	2.63889	1.64188	3.6359	0.00239899	2.39899	1.49262	3.30536	0.0916667	1.83333	1.13114	2.53553	0.00167046	1.67046	1.03065	2.31028
ovary	99.9.	tf	0.545661	0.0607993	0.701683	0.701462	0.0739754	0.679705	0.723218	0.00238211	0.00206343	0.00270079	0.05	1.66667	0.923731	2.4096	0.00151515	1.51515	0.839755	2.19055	0.175	3.5	2.57207	4.42793	0.00318907	3.18907	2.34357	4.03456
pancreatic	99.	reg	0.556914	0.0195132	0.602149	0.601011	0.0186388	0.594029	0.607994	0.0443063	0.0388052	0.0498073	0.138697	4.62324	4.26875	4.97774	0.0457071	4.57071	4.22024	4.92117	0.19387	3.87739	3.62944	4.12535	0.0384207	3.84207	3.59637	4.08776
pancreatic	99.	sec_str	0.548031	0.0237884	0.593514	0.594906	0.0498603	0.586393	0.603418	0.0168073	0.0155335	0.018081	0.0590038	1.96679	1.69321	2.24037	0.0194444	1.94444	1.67397	2.21492	0.0927203	1.85441	1.63953	2.06928	0.0183751	1.83751	1.62459	2.05043
pancreatic	99.	tad	0.49403	0.00657285	0.505898	0.507048	0.00785916	0.504696	0.5094	0.0107537	0.0104943	0.0110131	0.035249	1.17497	1.03125	1.31869	0.0116162	1.16162	1.01953	1.30371	0.0390805	0.781609	0.688439	0.87478	0.00774487	0.774487	0.682166	0.866809
pancreatic	99.	tf	0.513784	0.0253615	0.563196	0.563221	0.025962	0.554145	0.572296	0.0184544	0.0165988	0.0203099	0.0908046	3.02682	2.68648	3.36716	0.0299242	2.99242	2.65595	3.3289	0.118391	2.36782	2.1176	2.61803	0.0234624	2.34624	2.0983	2.59418
pancreatic	99.5.	reg	0.578119	0.0339358	0.669157	0.661588	0.0184331	0.649444	0.673732	0.0317009	0.0266957	0.036706	0.212403	7.0801	6.48056	7.67965	0.034596	6.91919	6.33327	7.50511	0.25969	5.1938	4.79779	5.5898	0.0254366	5.08732	4.69943	5.47521
pancreatic	99.5.	sec_str	0.531455	0.0500155	0.61604	0.62094	0.0725322	0.603042	0.638838	0.00880742	0.00814308	0.00947176	0.0736434	2.45478	2.07566	2.8339	0.0119949	2.39899	2.02849	2.76949	0.131008	2.62016	2.33526	2.90505	0.0128322	2.56644	2.28739	2.84549
pancreatic	99.5.	tad	0.478543	0.0175608	0.509182	0.511278	0.0197556	0.504994	0.517562	0.00583884	0.00542267	0.006255	0.0581395	1.93798	1.61424	2.26173	0.0094697	1.89394	1.57755	2.21033	0.0620155	1.24031	1.0247	1.45592	0.00607441	1.21488	1.00369	1.42607
pancreatic	99.5.	tf	0.503418	0.0533646	0.606471	0.606247	0.0560944	0.587151	0.625344	0.00919981	0.00827696	0.0101227	0.0922481	3.07494	2.67273	3.47715	0.0150253	3.00505	2.61198	3.39812	0.115504	2.31008	2.00889	2.61127	0.0113136	2.26272	1.9677	2.55774
pancreatic	99.9.	reg	0.625783	0.077882	0.765834	0.760774	0.110371	0.732905	0.788644	0.0477321	0.0332419	0.0622222	0.5	16.6667	15.1199	18.2135	0.0170455	17.0455	15.4635	18.6274	0.5	10	9.07193	10.9281	0.0102506	10.2506	9.29924	11.2019
pancreatic	99.9.	sec_str	0.454344	0.0923193	0.647561	0.636808	0.274046	0.603772	0.669844	0.0110944	0.00232365	0.0198651	0.162963	5.4321	3.77259	7.09161	0.00555556	5.55556	3.85833	7.25278	0.214815	4.2963	3.25352	5.33907	0.00440395	4.40395	3.33505	5.47285
pancreatic	99.9.	tad	0.427316	0.0570686	0.508406	0.512497	0.0272702	0.492075	0.532919	0.00141205	0.0012036	0.00162051	0.037037	1.23457	0.59911	1.87003	0.00126263	1.26263	0.612726	1.91253	0.0555556	1.11111	0.65597	1.56625	0.00113895	1.13895	0.672407	1.6055
pancreatic	99.9.	tf	0.448154	0.0935838	0.685276	0.658317	0.187994	0.624828	0.691806	0.0219375	0.00302217	0.0408529	0.0666667	2.22222	0.98675	3.45769	0.00227273	2.27273	1.00918	3.53628	0.111111	2.22222	1.28829	3.15615	0.0022779	2.2779	1.32057	3.23523
prostate	99.	chromatin	0.491868	0.00619127	0.503182	0.502733	0.00688937	0.500518	0.504949	0.010069	0.00990503	0.0102329	0.0260536	0.868455	0.685097	1.05181	0.00858586	0.858586	0.677311	1.03986	0.0268199	0.536398	0.423453	0.649344	0.00531511	0.531511	0.419595	0.643427
prostate	99.	reg	0.511951	0.0280358	0.550473	0.554145	0.0326069	0.544112	0.564177	0.0138563	0.0127487	0.0149639	0.0329502	1.09834	0.91569	1.28099	0.0108586	1.08586	0.905284	1.26643	0.0521073	1.04215	0.854142	1.23015	0.0103265	1.03265	0.84636	1.21894
prostate	99.	sec_str	0.563974	0.0360269	0.64321	0.638243	0.0414229	0.625351	0.651135	0.0286581	0.0248329	0.0324833	0.0624521	2.08174	1.7685	2.39497	0.0205808	2.05808	1.7484	2.36776	0.10728	2.14559	1.86117	2.43002	0.0212604	2.12604	1.84421	2.40787
prostate	99.	tad	0.492527	0.00725093	0.503895	0.503682	0.00691464	0.501087	0.506276	0.0106295	0.0102843	0.0109747	0.0237548	0.791826	0.582085	1.00157	0.00782828	0.782828	0.57547	0.990186	0.0252874	0.505747	0.365076	0.646418	0.00501139	0.501139	0.36175	0.640528
prostate	99.	tf	0.569408	0.0185193	0.6111	0.613751	0.0416468	0.607124	0.620378	0.0245645	0.0218997	0.0272293	0.131801	4.39336	4.09269	4.69403	0.0434343	4.34343	4.04618	4.64069	0.169732	3.39464	3.20919	3.58008	0.0336371	3.36371	3.17995	3.54746
prostate	99.5.	chromatin	0.49593	0.018514	0.522871	0.524115	0.016647	0.51749	0.53074	0.00596142	0.00566146	0.00626139	0.0401515	1.33838	0.999313	1.67746	0.00669192	1.33838	0.999313	1.67746	0.0568182	1.13636	0.932622	1.34011	0.00569476	1.13895	0.934747	1.34316
prostate	99.5.	reg	0.564608	0.0357662	0.656268	0.652243	0.0439651	0.639444	0.665041	0.00932488	0.00886171	0.00978806	0.0295455	0.984848	0.698745	1.27095	0.00492424	0.984848	0.698745	1.27095	0.0704545	1.40909	1.0913	1.72689	0.0070615	1.4123	1.09378	1.73082
prostate	99.5.	sec_str	0.666309	0.0242733	0.699188	0.701035	0.0448157	0.692349	0.709721	0.0153013	0.0121275	0.0184751	0.0651515	2.17172	1.81057	2.53287	0.0108586	2.17172	1.81057	2.53287	0.115152	2.30303	2.05056	2.5555	0.0115414	2.30828	2.05523	2.56132
prostate	99.5.	tad	0.478209	0.0100455	0.499505	0.499122	0.017434	0.495527	0.502717	0.00517224	0.00498507	0.0053594	0.0242424	0.808081	0.595294	1.02087	0.0040404	0.808081	0.595294	1.02087	0.0295455	0.590909	0.461698	0.72012	0.00296128	0.592255	0.46275	0.72176
prostate	99.5.	tf	0.566271	0.0354112	0.639269	0.639986	0.0411027	0.627314	0.652658	0.0122356	0.011224	0.0132472	0.142424	4.74747	4.23442	5.26053	0.0237374	4.74747	4.23442	5.26053	0.173485	3.4697	3.10104	3.83835	0.017388	3.4776	3.10811	3.84709
prostate	99.9.	chromatin	0.541885	0.0599966	0.70265	0.695408	0.11008	0.673938	0.716877	0.00218137	0.00193289	0.00242985	0.0666667	2.22222	1.37033	3.07411	0.0020202	2.0202	1.24576	2.79465	0.104167	2.08333	1.50387	2.66279	0.00189825	1.89825	1.37027	2.42623
prostate	99.9.	reg	0.44675	0.071677	0.666066	0.670525	0.114946	0.644876	0.696175	0.00384755	0.00112732	0.00656778	0.1	3.33333	2.13283	4.53384	0.0030303	3.0303	1.93893	4.12167	0.158333	3.16667	2.17176	4.16157	0.00288535	2.88535	1.97883	3.79187
prostate	99.9.	sec_str	0.577554	0.0690402	0.729698	0.735722	0.148268	0.711017	0.760428	0.0027256	0.00231282	0.00313839	0.104167	3.47222	2.29211	4.65233	0.00315657	3.15657	2.08374	4.22939	0.15	3	2.13999	3.86001	0.00273349	2.73349	1.94988	3.51709
prostate	99.9.	tad	0.345192	0.0906574	0.556647	0.541887	0.0820103	0.509446	0.574328	0.00176172	0.0013011	0.00222234	0.0625	2.08333	1.1444	3.02227	0.00189394	1.89394	1.04036	2.74751	0.0791667	1.58333	0.940647	2.22602	0.00144267	1.44267	0.857082	2.02826
prostate	99.9.	tf	0.49948	0.0765036	0.646961	0.644714	0.140237	0.617337	0.67209	0.00222384	0.00179239	0.00265529	0.0833333	2.77778	1.8735	3.68205	0.00252525	2.52525	1.70319	3.34732	0.1375	2.75	2.03161	3.46839	0.00250569	2.50569	1.85113	3.16026
skin	99.	chromatin	0.496683	0.0127092	0.519659	0.519166	0.0134099	0.514618	0.523713	0.0114044	0.0110019	0.0118068	0.0375479	1.2516	1.06474	1.43846	0.0123737	1.23737	1.05264	1.42211	0.0605364	1.21073	1.05961	1.36185	0.011997	1.1997	1.04995	1.34944
skin	99.	histones	0.511362	0.0134906	0.530562	0.534716	0.00657304	0.529889	0.539544	0.0136098	0.0129202	0.0142995	0.0670498	2.23499	1.87121	2.59878	0.022096	2.2096	1.84994	2.56925	0.112261	2.24521	2.08113	2.40929	0.0222475	2.22475	2.06217	2.38734
skin	99.	methyl	0.527478	0.0112746	0.559943	0.559671	0.0123783	0.555637	0.563706	0.0146002	0.0140516	0.0151489	0.0536398	1.78799	1.49475	2.08124	0.0176768	1.76768	1.47776	2.05759	0.112261	2.24521	2.02103	2.46939	0.0222475	2.22475	2.00262	2.44689
skin	99.	reg	0.518457	0.021433	0.552998	0.556191	0.0258643	0.548522	0.563861	0.0143077	0.0136988	0.0149165	0.0685824	2.28608	1.9992	2.57296	0.022601	2.2601	1.97648	2.54372	0.123755	2.4751	2.31681	2.63338	0.0245254	2.45254	2.2957	2.60939
skin	99.	sec_str	0.550271	0.0229399	0.579701	0.582833	0.0435176	0.574624	0.591042	0.0158224	0.014625	0.0170197	0.0582375	1.94125	1.64449	2.23802	0.0191919	1.91919	1.6258	2.21258	0.106513	2.13027	1.89967	2.36086	0.0211086	2.11086	1.88237	2.33935
skin	99.	tad	0.488447	0.00612648	0.499877	0.500405	0.00445579	0.498212	0.502597	0.0101563	0.00991564	0.010397	0.0183908	0.613027	0.453623	0.772431	0.00606061	0.606061	0.448468	0.763653	0.0191571	0.383142	0.288152	0.478131	0.00379651	0.379651	0.285527	0.473775
skin	99.	tf	0.523247	0.0213902	0.571423	0.570089	0.0353719	0.562435	0.577743	0.0155438	0.0147478	0.0163397	0.0727969	2.42656	2.17367	2.67946	0.0239899	2.39899	2.14897	2.64901	0.111877	2.23755	2.0444	2.43069	0.0221716	2.21716	2.02577	2.40855
skin	99.5.	chromatin	0.496004	0.0161981	0.52254	0.525993	0.0326656	0.520196	0.531789	0.00640319	0.00586959	0.0069368	0.0302326	1.00775	0.672727	1.34278	0.00492424	0.984848	0.657438	1.31226	0.0821705	1.64341	1.45935	1.82747	0.0080486	1.60972	1.42943	1.79001
skin	99.5.	histones	0.472246	0.0238737	0.534216	0.530117	0.0352208	0.521574	0.53866	0.00672446	0.00593634	0.00751258	0.0418605	1.39535	1.00713	1.78357	0.00681818	1.36364	0.984237	1.74304	0.0852713	1.70543	1.4687	1.94216	0.00835232	1.67046	1.43859	1.90234
skin	99.5.	methyl	0.514121	0.0240184	0.575119	0.577428	0.0103246	0.568833	0.586022	0.00854953	0.00776986	0.00932919	0.0465116	1.55039	1.15809	1.94269	0.00757576	1.51515	1.13177	1.89854	0.0984496	1.96899	1.72688	2.21111	0.00964313	1.92863	1.69147	2.16578
skin	99.5.	reg	0.49738	0.0312805	0.563646	0.557881	0.0567854	0.546687	0.569075	0.00656631	0.00617493	0.00695769	0.0410853	1.36951	1.08101	1.65801	0.00669192	1.33838	1.05644	1.62032	0.0682171	1.36434	1.0813	1.64738	0.00668185	1.33637	1.05913	1.61361
skin	99.5.	sec_str	0.54868	0.0370621	0.601775	0.610452	0.0798281	0.597189	0.623714	0.00933659	0.00805549	0.0106177	0.0666667	2.22222	1.82499	2.61945	0.0108586	2.17172	1.78351	2.55992	0.116279	2.32558	2.02913	2.62203	0.0113895	2.2779	1.98753	2.56828
skin	99.5.	tad	0.465569	0.0149469	0.498305	0.501385	0.0195778	0.496037	0.506734	0.00550098	0.00516394	0.00583802	0.0263566	0.878553	0.629017	1.12809	0.00429293	0.858586	0.614722	1.10245	0.0379845	0.75969	0.571774	0.947606	0.00372058	0.744115	0.560052	0.928179
skin	99.5.	tf	0.502483	0.0363228	0.557453	0.561979	0.0810948	0.548981	0.574977	0.0068466	0.00626248	0.00743072	0.0581395	1.93798	1.50855	2.36742	0.0094697	1.89394	1.47426	2.31362	0.0883721	1.76744	1.46023	2.07465	0.00865604	1.73121	1.43029	2.03212
skin	99.9.	chromatin	0.534543	0.073803	0.667056	0.671878	0.0985141	0.645468	0.698289	0.00197935	0.00173447	0.00222424	0.0791667	2.63889	1.64188	3.6359	0.00239899	2.39899	1.49262	3.30536	0.141667	2.83333	2.18	3.48667	0.00258162	2.58162	1.98633	3.17692
skin	99.9.	histones	0.310058	0.104952	0.536897	0.528363	0.206197	0.490807	0.56592	0.00103964	0.000923516	0.00115577	0	0	0	0	0	0	0	0	0	0	0	0	0	0	0	0
skin	99.9.	methyl	0.463577	0.0829839	0.605193	0.59925	0.14484	0.569554	0.628945	0.00208189	0.00140507	0.00275871	0.0791667	2.63889	1.56775	3.71003	0.00239899	2.39899	1.42522	3.37276	0.1125	2.25	1.57112	2.92888	0.00205011	2.05011	1.43154	2.66869
skin	99.9.	reg	0.509912	0.0670209	0.678043	0.677036	0.125862	0.653053	0.701019	0.00153593	0.00141043	0.00166143	0.00833333	0.277778	-0.100507	0.656062	0.000252525	0.252525	-0.0913698	0.59642	0.0375	0.75	0.333028	1.16697	0.000683371	0.683371	0.303443	1.0633
skin	99.9.	sec_str	0.454298	0.076855	0.629005	0.615485	0.223343	0.587983	0.642987	0.00145949	0.00131307	0.00160591	0.0208333	0.694444	0.0068847	1.382	0.000631313	0.631313	0.00625882	1.25637	0.0875	1.75	1.16738	2.33262	0.00159453	1.59453	1.06367	2.1254
skin	99.9.	tad	0.360146	0.0781491	0.498476	0.509878	0.0708685	0.481912	0.537843	0.00149914	0.00116669	0.00183159	0.0625	2.08333	0.860682	3.30598	0.00189394	1.89394	0.782438	3.00544	0.120833	2.41667	1.43432	3.39901	0.00220197	2.20197	1.3069	3.09705
skin	99.9.	tf	0.458058	0.0817597	0.6737	0.647071	0.141629	0.617814	0.676329	0.00188207	0.00154762	0.00221653	0.0875	2.91667	1.86965	3.96368	0.00265152	2.65152	1.69968	3.60335	0.120833	2.41667	1.52257	3.31077	0.00220197	2.20197	1.38731	3.01664
uterus	99.	chromatin	0.503345	0.0148515	0.541204	0.538338	0.00729783	0.533023	0.543652	0.017378	0.0158077	0.0189483	0.0954023	3.18008	2.84011	3.52004	0.0314394	3.14394	2.80784	3.48004	0.110345	2.2069	2.01056	2.40324	0.0218679	2.18679	1.99224	2.38134
uterus	99.	histones	0.509672	0.0145209	0.534018	0.533324	0.0172901	0.528128	0.538521	0.0127899	0.012236	0.0133438	0.0605364	2.01788	1.77121	2.26455	0.0199495	1.99495	1.75109	2.23881	0.100383	2.00766	1.83224	2.18308	0.0198937	1.98937	1.81555	2.16319
uterus	99.	methyl	0.48991	0.0184047	0.519891	0.519558	0.0190494	0.512972	0.526144	0.0120611	0.0113535	0.0127688	0.0321839	1.0728	0.910172	1.23542	0.0106061	1.06061	0.89983	1.22138	0.0613027	1.22605	1.02766	1.42444	0.0121488	1.21488	1.0183	1.41147
uterus	99.	reg	0.506892	0.0168872	0.527844	0.531472	0.0408944	0.525429	0.537515	0.0120731	0.0115231	0.0126231	0.045977	1.53257	1.35618	1.70896	0.0151515	1.51515	1.34076	1.68954	0.0743295	1.48659	1.33121	1.64197	0.0147304	1.47304	1.31908	1.62701
uterus	99.	sec_str	0.546766	0.0203477	0.583787	0.588789	0.0419579	0.581508	0.596071	0.0170499	0.0162003	0.0178995	0.0827586	2.75862	2.51336	3.00388	0.0272727	2.72727	2.4848	2.96975	0.119157	2.38314	2.23906	2.52723	0.0236143	2.36143	2.21865	2.5042
uterus	99.	tad	0.489768	0.0070714	0.496593	0.499298	0.00498323	0.496767	0.501828	0.00997703	0.00976633	0.0101877	0.0149425	0.498084	0.340521	0.655648	0.00492424	0.492424	0.336651	0.648197	0.0172414	0.344828	0.228992	0.460663	0.00341686	0.341686	0.226906	0.456466
uterus	99.	tf	0.503357	0.0232612	0.5565	0.554453	0.0425073	0.546129	0.562777	0.0161578	0.0145451	0.0177705	0.0804598	2.68199	2.44589	2.9181	0.0265152	2.65152	2.41809	2.88494	0.115709	2.31418	2.14009	2.48826	0.0229309	2.29309	2.12059	2.46559
uterus	99.5.	chromatin	0.534956	0.0285114	0.585624	0.585973	0.00746376	0.57577	0.596175	0.0147072	0.0126121	0.0168023	0.134127	4.4709	3.9624	4.9794	0.0213384	4.26768	3.78229	4.75306	0.15873	3.1746	2.87	3.47921	0.015186	3.03721	2.74578	3.32863
uterus	99.5.	histones	0.514618	0.0301868	0.573676	0.573004	0.0194134	0.562202	0.583807	0.00776025	0.00708828	0.00843222	0.0777778	2.59259	2.14551	3.03968	0.0123737	2.47475	2.04798	2.90151	0.116667	2.33333	2.03532	2.63135	0.0111617	2.23235	1.94723	2.51746
uterus	99.5.	methyl	0.51824	0.0274457	0.606352	0.604337	0.00965106	0.594516	0.614158	0.00916444	0.0084908	0.00983808	0.0626984	2.08995	1.7363	2.4436	0.00997475	1.99495	1.65738	2.33252	0.119841	2.39683	2.08523	2.70842	0.0114655	2.29309	1.99498	2.5912
uterus	99.5.	reg	0.529658	0.0286496	0.588114	0.584295	0.052011	0.574043	0.594547	0.00751383	0.00694259	0.00808506	0.0492063	1.64021	1.26779	2.01263	0.00782828	1.56566	1.21017	1.92115	0.0896825	1.79365	1.49788	2.08942	0.00858011	1.71602	1.43305	1.99899
uterus	99.5.	sec_str	0.617286	0.0354391	0.693159	0.690795	0.0626428	0.678113	0.703476	0.0135042	0.0104209	0.0165875	0.0777778	2.59259	2.18454	3.00065	0.0123737	2.47475	2.08524	2.86425	0.130159	2.60317	2.2691	2.93725	0.0124525	2.49051	2.17089	2.81013
uterus	99.5.	tad	0.469179	0.00759877	0.487763	0.487441	0.0157677	0.484722	0.490161	0.00445622	0.00440222	0.00451022	0.00238095	0.0793651	-0.00729275	0.166023	0.000378788	0.0757576	-0.00696126	0.158476	0.00793651	0.15873	0.0553847	0.262076	0.000759301	0.15186	0.0529876	0.250733
uterus	99.5.	tf	0.527164	0.035542	0.59602	0.602521	0.039478	0.589802	0.615239	0.00957518	0.0087766	0.0103738	0.100794	3.35979	2.90806	3.81151	0.0160354	3.20707	2.77588	3.63826	0.15	3	2.67684	3.32316	0.0143508	2.87016	2.56098	3.17933
uterus	99.9.	chromatin	0.540383	0.078556	0.666793	0.682286	0.0987134	0.654175	0.710396	0.00235298	0.00206024	0.00264571	0.0814815	2.71605	1.67576	3.75634	0.00277778	2.77778	1.71384	3.84171	0.140741	2.81481	2.09341	3.53622	0.00288535	2.88535	2.14586	3.62483
uterus	99.9.	histones	0.533149	0.0572004	0.684269	0.680229	0.118946	0.65976	0.700698	0.00203109	0.0018125	0.00224968	0.0407407	1.35802	0.621057	2.09499	0.00138889	1.38889	0.635172	2.14261	0.0555556	1.11111	0.65597	1.56625	0.00113895	1.13895	0.672407	1.6055
uterus	99.9.	methyl	0.489828	0.0761151	0.637778	0.638632	0.110215	0.611395	0.66587	0.00226091	0.00190731	0.00261452	0.0296296	0.987654	0.29737	1.67794	0.0010101	1.0101	0.304128	1.71607	0.0851852	1.7037	1.12484	2.28256	0.00174639	1.74639	1.15303	2.33976
uterus	99.9.	reg	0.542213	0.0570411	0.643465	0.649897	0.170451	0.629485	0.670308	0.00169118	0.00154171	0.00184064	0.0444444	1.48148	0.734987	2.22798	0.00151515	1.51515	0.751691	2.27861	0.0814815	1.62963	1.12095	2.13831	0.00167046	1.67046	1.14903	2.19189
uterus	99.9.	sec_str	0.60851	0.0538696	0.693302	0.696461	0.156239	0.677184	0.715738	0.00237267	0.00218605	0.00255929	0.0962963	3.20988	2.1813	4.23846	0.00328283	3.28283	2.23087	4.33478	0.174074	3.48148	2.76767	4.19529	0.00356872	3.56872	2.83702	4.30041
uterus	99.9.	tad	0.362709	0.0498226	0.474216	0.47784	0.0660634	0.460012	0.495669	0.00105807	0.000995987	0.00112015	0.0185185	0.617284	0.11491	1.11966	0.000631313	0.631313	0.117522	1.1451	0.0481481	0.962963	0.562171	1.36376	0.000987092	0.987092	0.576257	1.39793
uterus	99.9.	tf	0.578121	0.05321	0.647735	0.650911	0.149252	0.631871	0.669952	0.00192735	0.0017555	0.0020992	0.0888889	2.96296	2.15416	3.77177	0.0030303	3.0303	2.20311	3.85749	0.122222	2.44444	2.06222	2.82667	0.00250569	2.50569	2.11389	2.8975
